# Supplementary material for: The subgingival microbiome of clinically healthy current and never smokers
Source: PubMed Central journal article supplement — ISME J. 2014 Jul 11;9(1):268–72. doi: 10.1038/ismej.2014.114 (PMC4274424; doi:10.1038/ismej.2014.114), 2014-07-11
Supplement: ismej2014114x2.pdf [file ismej2014114x2.pdf]

|                                                           | Never smokers<br>(n=100) | Current smokers<br>(n=100) | p-value    |
|-----------------------------------------------------------|--------------------------|----------------------------|------------|
| Mean age (years)                                          | 27.0 ± 5.3               | 28.5 ± 3.5                 | p = 0.20   |
| Gender- female (percent)                                  | 87.5                     | 56.4                       | p = 0.18   |
| Race (percent)                                            |                          |                            | p = 0.09   |
| <i>Caucasian</i>                                          | 25.0                     | 67.0                       | p = 0.03   |
| <i>African-American</i>                                   | 25.0                     | 17.0                       | p = 0.06   |
| <i>Asian</i>                                              | 25.0                     | 13.0                       | p = 0.035  |
| <i>Other</i>                                              | 25.0                     | 3.0                        | p = 0.013  |
| Education (average years / individual)                    | 13 ± 3                   | 14 ± 2                     | p = 0.25   |
| Dental prophylaxis (number of annual visits / individual) | 0.96                     | 0.97                       | p = 0.23   |
| Brushing frequency (times per day / individual)           | 1.57                     | 1.28                       | p = 0.23   |
| Frequency of flossing (times per day)                     | 1.0                      | 1.0                        | p = 0.23   |
| Tobacco exposure (pack years)                             | 0.0                      | 5.6 ± 2.4                  | p = 0.0015 |
