# Supplementary material for: The subgingival microbiome of clinically healthy current and never smokers
Source: PubMed Central journal article supplement — ISME J. 2014 Jul 11;9(1):268–72. doi: 10.1038/ismej.2014.114 (PMC4274424; doi:10.1038/ismej.2014.114), 2014-07-11
Supplement: ismej2014114x3.pdf [file ismej2014114x3.pdf]

| s-OTU                                 | Overall abundance (%) | Mean±SD     |            | p-value |
|---------------------------------------|-----------------------|-------------|------------|---------|
|                                       |                       | Nonsmoker   | Smoker     |         |
| <i>Streptococcus pseudopneumoniae</i> | 11.6486               | 13.45±10.44 | 10.32±6.05 | 0.0102  |
| Streptococcus spp.                    | 10.1667               | 8.75±7.63   | 10.52±6.2  | 0.0731  |
| <i>Veillonella dispar</i>             | 6.4419                | 4.42±5.6    | 7.64±5.3   | <0.0001 |
| <i>Fusobacterium nucleatum</i>        | 6.1279                | 3.97±3.77   | 7.4±5.48   | <0.0001 |
| Fusobacterium spp.                    | 5.8793                | 4.36±4.2    | 6.43±4.66  | 0.0011  |
| Unclassified Clostridiaceae           | 3.8155                | 1.7±1.78    | 5.49±4.13  | <0.0001 |
| Selenomonas spp.                      | 2.8927                | 3.92±4.63   | 2.64±2.93  | 0.0208  |
| Unclassified Veillonellaceae          | 2.77                  | 2.86±3.94   | 2.94±2.76  | 0.8582  |
| Parascardovia spp.                    | 2.0752                | 2.69±3.39   | 1.78±3.3   | 0.0564  |
| <i>Veillonella parvula</i>            | 1.6785                | 1.41±1.46   | 1.93±1.79  | 0.024   |
| Kingella spp.                         | 1.6715                | 2.86±3.73   | 1.15±1.92  | 0.0001  |
| Prevotella spp.                       | 1.664                 | 2.14±2.3    | 1.24±1.29  | 0.0008  |
| <i>Haemophilus parainfluenzae</i>     | 1.3955                | 2.26±5.67   | 0.44±1.2   | 0.0019  |
| TG5 spp.                              | 1.1943                | 0.75±1.52   | 1.55±2.04  | 0.0021  |
| Treponema spp.                        | 1.174                 | 2.63±5.01   | 0.57±0.84  | 0.0001  |
| Unclassified Lachnospiraceae          | 1.1341                | 1.26±1.15   | 1.16±0.8   | 0.4895  |
| <i>Dialister invisus</i>              | 1.1215                | 1.45±1.93   | 0.92±0.75  | 0.0107  |
| Gemella spp.                          | 1.0859                | 1.23±1.41   | 0.98±0.95  | 0.15    |
| Porphyromonas spp.                    | 1.0378                | 1.99±4.54   | 0.31±0.83  | 0.0003  |
| <i>Fusobacterium canifelinum</i>      | 1.0289                | 0.56±0.92   | 1.27±1.5   | 0.0001  |
| Leptotrichia spp.                     | 1.0004                | 0.89±1.04   | 1.03±1.48  | 0.4449  |
| Aeromicrobium spp.                    | 0.9353                | 0.07±0.34   | 1.71±2.42  | <0.0001 |
| Filifactor spp.                       | 0.929                 | 0.41±0.75   | 1.37±1.88  | <0.0001 |
| <i>Porphyromonas endodontalis</i>     | 0.9264                | 0.79±1.58   | 0.97±1.83  | 0.4521  |
| Unclassified TM7-3                    | 0.8774                | 1.1±2.48    | 0.67±0.89  | 0.1018  |
| Prevotella oris                       | 0.8328                | 0.63±1.08   | 0.81±0.94  | 0.2085  |
| Granulicatella spp.                   | 0.7743                | 1.28±1.71   | 0.36±0.37  | <0.0001 |
| Corynebacterium spp.                  | 0.7179                | 1.03±1.59   | 0.58±0.92  | 0.0139  |
| Unclassified Neisseriaceae            | 0.704                 | 1.21±2.02   | 0.37±0.53  | 0.0001  |
| Selenomonas noxia                     | 0.674                 | 1.04±3.42   | 0.52±0.7   | 0.1396  |
| Neisseria spp.                        | 0.6712                | 1.2±2.77    | 0.43±1.12  | 0.0106  |
| Filifactor alocis                     | 0.6558                | 0.03±0.07   | 1.1±1.66   | <0.0001 |
| Unclassified Bacteroidales            | 0.6356                | 0.87±1.58   | 0.45±0.76  | 0.016   |
| Unclassified Peptostreptococcaceae    | 0.5445                | 0.93±1.78   | 0.35±0.33  | 0.0017  |
| Capnocytophaga spp.                   | 0.5409                | 0.76±0.85   | 0.37±0.61  | 0.0003  |
| <i>Campylobacter gracilis</i>         | 0.5027                | 0.54±0.69   | 0.48±0.33  | 0.4328  |
| <i>Prevotella melaninogenica</i>      | 0.4807                | 0.37±0.59   | 0.46±0.91  | 0.4417  |
| Desulfobulbus spp.                    | 0.4748                | 0.08±0.27   | 0.77±1.5   | <0.0001 |
| <i>Prevotella tannerae</i>            | 0.4723                | 0.62±1.83   | 0.3±0.65   | 0.1047  |
| Unclassified Streptococcaceae         | 0.4692                | 0.21±0.2    | 0.65±0.6   | <0.0001 |

|                                      |        |           |           |         |
|--------------------------------------|--------|-----------|-----------|---------|
| <i>Prevotella intermedia</i>         | 0.4502 | 0.99±2.4  | 0.05±0.26 | 0.0001  |
| Lautropia spp.                       | 0.4497 | 0.99±2.83 | 0.08±0.18 | 0.0016  |
| <i>Treponema socranskii</i>          | 0.4415 | 0.62±0.73 | 0.37±0.33 | 0.0019  |
| <i>Rothia dentocariosa</i>           | 0.3772 | 0.46±1.26 | 0.24±0.36 | 0.0957  |
| Veillonella spp.                     | 0.3665 | 0.32±1.79 | 0.3±0.56  | 0.9087  |
| Prevotella spp.                      | 0.3622 | 0.66±2.86 | 0.04±0.07 | 0.0339  |
| <i>Eikenella corrodens</i>           | 0.3589 | 0.13±0.15 | 0.6±0.79  | <0.0001 |
| <i>Tannerella forsythia</i>          | 0.347  | 0.33±0.8  | 0.34±0.66 | 0.9243  |
| Unclassified Rs-045                  | 0.337  | 0.18±0.43 | 0.41±1.25 | 0.0784  |
| <i>Streptococcus sobrinus</i>        | 0.3353 | 0.1±0.4   | 0.51±0.86 | <0.0001 |
| Unclassified Clostridia              | 0.3324 | 0.23±0.61 | 0.47±0.74 | 0.0143  |
| Kingella oralis                      | 0.3262 | 0.36±0.77 | 0.22±1.08 | 0.2766  |
| Oribacterium spp.                    | 0.3203 | 0.2±0.32  | 0.39±0.42 | 0.0002  |
| Lactobacillus spp.                   | 0.3075 | 0.01±0.06 | 0.48±2.52 | 0.0659  |
| Megasphaera spp.                     | 0.3068 | 0.07±0.17 | 0.48±0.89 | <0.0001 |
| <i>Abiotrophia defectiva</i>         | 0.2987 | 0.37±0.5  | 0.31±0.45 | 0.3753  |
| <i>Prevotella nigrescens</i>         | 0.297  | 0.5±0.83  | 0.16±0.32 | 0.0003  |
| Dietzia spp.                         | 0.2865 | 0.5±1.39  | 0.16±0.21 | 0.0174  |
| Campylobacter spp.                   | 0.2861 | 0.26±0.29 | 0.29±0.37 | 0.5122  |
| Eikenella spp.                       | 0.2841 | 0.24±0.29 | 0.3±0.34  | 0.1819  |
| Atopobium spp.                       | 0.2827 | 0.07±0.13 | 0.38±0.73 | 0.0001  |
| Unclassified Micrococcaceae          | 0.2657 | 0.36±0.72 | 0.21±0.37 | 0.0776  |
| <i>Streptococcus infantis</i>        | 0.2575 | 0.33±0.39 | 0.17±0.17 | 0.0003  |
| <i>Corynebacterium durum</i>         | 0.2562 | 0.4±0.78  | 0.09±0.34 | 0.0003  |
| Catonella spp.                       | 0.2451 | 0.21±0.27 | 0.29±0.37 | 0.0602  |
| <i>Lactobacillus salivarius</i>      | 0.2419 | 0±0       | 0.36±1.2  | 0.003   |
| Enterococcus spp.                    | 0.2318 | 0.02±0.1  | 0.43±1.56 | 0.0087  |
| <i>Aggregatibacter segnis</i>        | 0.2227 | 0.41±0.8  | 0.08±0.2  | 0.0001  |
| <i>Capnocytophaga ochracea</i>       | 0.2207 | 0.32±0.38 | 0.16±0.21 | 0.0005  |
| <i>Treponema amylovorum</i>          | 0.2071 | 0.21±0.45 | 0.22±0.39 | 0.7967  |
| <i>Treponema denticola</i>           | 0.2027 | 0.53±1.33 | 0.09±0.15 | 0.0011  |
| <i>Peptostreptococcus anaerobius</i> | 0.2007 | 0.15±0.28 | 0.27±0.53 | 0.0556  |
| <i>Actinomyces oris</i>              | 0.195  | 0.14±0.25 | 0.21±0.57 | 0.2231  |
| <i>Enterococcus saccharolyticus</i>  | 0.1925 | 0.21±1.56 | 0.23±0.83 | 0.9011  |
| <i>Streptococcus oligofermentans</i> | 0.184  | 0.04±0.04 | 0.31±0.37 | <0.0001 |
| <i>Campylobacter rectus</i>          | 0.181  | 0.29±0.53 | 0.15±0.2  | 0.0114  |
| <i>Megasphaera geminatus</i>         | 0.1776 | 0.06±0.15 | 0.26±0.48 | 0.0001  |
| Actinomyces spp.                     | 0.1763 | 0.12±0.22 | 0.22±0.17 | 0.0011  |
| <i>Streptococcus anginosus</i>       | 0.165  | 0.13±0.12 | 0.19±0.19 | 0.0126  |
| <i>Rothia mucilaginosa</i>           | 0.1568 | 0.14±0.28 | 0.16±0.27 | 0.7772  |
| <i>Corynebacterium matruchotii</i>   | 0.1566 | 0.21±0.39 | 0.15±0.3  | 0.1894  |
| Aggregatibacter spp.                 | 0.1523 | 0.28±0.58 | 0.05±0.09 | 0.0001  |

|                                              |        |           |           |         |
|----------------------------------------------|--------|-----------|-----------|---------|
| <i>Lactobacillus gasseri</i>                 | 0.15   | 0.01±0.09 | 0.22±1    | 0.0398  |
| Peptococcus spp.                             | 0.1466 | 0.2±0.29  | 0.14±0.16 | 0.0996  |
| Unclassified Gemellaceae                     | 0.1442 | 0.14±0.26 | 0.12±0.14 | 0.4869  |
| <i>Leptotrichia hofstadii</i>                | 0.1436 | 0.1±0.35  | 0.17±0.37 | 0.1563  |
| Unclassified Leptotrichiaceae                | 0.1384 | 0.14±0.54 | 0.16±0.62 | 0.7575  |
| <i>Capnocytophaga gingivalis</i>             | 0.1339 | 0.31±0.55 | 0.05±0.07 | <0.0001 |
| <i>Aggregatibacter actinomycetemcomitans</i> | 0.1319 | 0.24±1.34 | 0.05±0.21 | 0.1591  |
| Moryella spp.                                | 0.1265 | 0.09±0.21 | 0.16±0.16 | 0.0163  |
| <i>Enterococcus casseliflavus</i>            | 0.1222 | 0.06±0.4  | 0.2±0.72  | 0.091   |
| <i>Neisseria meningitidis</i>                | 0.1212 | 0.36±0.8  | 0.01±0.02 | <0.0001 |
| <i>Prevotella oulorum</i>                    | 0.1201 | 0.13±0.35 | 0.11±0.21 | 0.6273  |
| Unclassified Comamonadaceae                  | 0.1123 | 0.13±0.24 | 0.11±0.17 | 0.38    |
| Johnsonella spp.                             | 0.1094 | 0.03±0.09 | 0.17±0.24 | <0.0001 |
| <i>Streptococcus phocae</i>                  | 0.1071 | 0.21±0.22 | 0.03±0.03 | <0.0001 |
| <i>Prevotella pleuritidis</i>                | 0.107  | 0.14±0.3  | 0.07±0.15 | 0.0595  |
| Haemophilus spp.                             | 0.1068 | 0.19±0.45 | 0.02±0.06 | 0.0002  |
| <i>Acinetobacter rhizosphaerae</i>           | 0.106  | 0.23±0.83 | 0.01±0.04 | 0.0109  |
| Tannerella spp.                              | 0.1045 | 0.13±0.27 | 0.09±0.14 | 0.1788  |
| Acinetobacter spp.                           | 0.1012 | 0.03±0.09 | 0.15±0.85 | 0.171   |
| Unclassified Actinomycetaceae                | 0.101  | 0.13±0.31 | 0.07±0.15 | 0.0768  |
| Schlegelella spp.                            | 0.1002 | 0.02±0.06 | 0.15±0.69 | 0.0651  |
| <i>Streptococcus mutans</i>                  | 0.0993 | 0.03±0.2  | 0.15±0.5  | 0.0363  |
| <i>Exiguobacterium aurantiacum</i>           | 0.0989 | 0.2±1.58  | 0.05±0.21 | 0.3323  |
| <i>Actinomyces naeslundii</i>                | 0.0988 | 0.05±0.14 | 0.14±0.29 | 0.0046  |
| <i>Rothia aeria</i>                          | 0.0971 | 0.19±0.47 | 0.03±0.1  | 0.001   |
| <i>Propionibacterium acnes</i>               | 0.0963 | 0.11±0.36 | 0.09±0.21 | 0.698   |
| Unclassified Bifidobacteriales               | 0.0937 | 0±0.01    | 0.17±0.23 | <0.0001 |
| Butyrivibrio spp.                            | 0.0906 | 0.12±0.48 | 0.08±0.23 | 0.4396  |
| Unclassified Lactobacillales                 | 0.09   | 0.09±0.13 | 0.07±0.14 | 0.3047  |
| Unclassified Ruminococcaceae                 | 0.0893 | 0.09±0.15 | 0.09±0.14 | 0.6923  |
| <i>Leptotrichia buccalis</i>                 | 0.0888 | 0.07±0.17 | 0.08±0.23 | 0.6668  |
| <i>Lactobacillus crispatus</i>               | 0.0835 | 0±0       | 0.12±0.71 | 0.0872  |
| <i>Megasphaera micronuciformis</i>           | 0.0824 | 0.04±0.08 | 0.11±0.16 | 0.0001  |
| <i>Treponema lecithinolyticum</i>            | 0.0808 | 0.09±0.17 | 0.08±0.17 | 0.8782  |
| Unclassified Gemellales                      | 0.0808 | 0.11±0.17 | 0.06±0.08 | 0.0051  |
| Unclassified Nocardioideae                   | 0.0787 | 0.03±0.13 | 0.11±0.19 | 0.0005  |
| Unclassified Flavobacteriaceae               | 0.0782 | 0.12±0.19 | 0.04±0.07 | 0.0001  |
| <i>Porphyromonas gingivalis</i>              | 0.0765 | 0.16±0.73 | 0.02±0.05 | 0.0583  |
| Unclassified Bacillales                      | 0.0713 | 0±0       | 0.13±0.17 | <0.0001 |
| <i>Streptococcus gordonii</i>                | 0.0696 | 0.03±0.09 | 0.1±0.16  | 0.0002  |
| <i>Campylobacter curvus</i>                  | 0.0693 | 0.17±0.27 | 0.01±0.03 | <0.0001 |
| Unclassified Propionibacteriaceae            | 0.0685 | 0.13±0.26 | 0.04±0.1  | 0.0018  |

|                                        |        |           |           |         |
|----------------------------------------|--------|-----------|-----------|---------|
| <i>Prevotella pallens</i>              | 0.0656 | 0.03±0.12 | 0.07±0.65 | 0.5096  |
| <i>Neisseria subflava</i>              | 0.0644 | 0.13±0.32 | 0.02±0.06 | 0.0008  |
| Peptostreptococcus spp.                | 0.0636 | 0.03±0.06 | 0.09±0.15 | 0.0002  |
| <i>Bulleidia moorei</i>                | 0.0635 | 0.06±0.09 | 0.05±0.1  | 0.742   |
| <i>Campylobacter concisus</i>          | 0.0605 | 0.08±0.11 | 0.04±0.09 | 0.0045  |
| <i>Prevotella denticola</i>            | 0.0587 | 0.05±0.14 | 0.06±0.12 | 0.7065  |
| <i>Arthrobacter psychrolactophilus</i> | 0.0581 | 0.05±0.16 | 0.07±0.12 | 0.4077  |
| <i>Scardovia inopinata</i>             | 0.0578 | 0.01±0.05 | 0.1±0.35  | 0.014   |
| Methylobacterium spp.                  | 0.0567 | 0.04±0.14 | 0.07±0.13 | 0.0574  |
| <i>Acinetobacter johnsonii</i>         | 0.0548 | 0.01±0.03 | 0.09±0.64 | 0.2374  |
| <i>Treponema maltophilum</i>           | 0.0535 | 0.15±0.38 | 0.02±0.05 | 0.0019  |
| <i>Thermomonas brevis</i>              | 0.0531 | 0.06±0.25 | 0.05±0.17 | 0.7251  |
| <i>Cardiobacterium hominis</i>         | 0.0529 | 0.13±0.23 | 0.01±0.02 | <0.0001 |
| <i>Lactobacillus zeae</i>              | 0.0507 | 0±0.01    | 0.08±0.3  | 0.0104  |
| <i>Streptococcus equi</i>              | 0.0504 | 0.04±0.05 | 0.06±0.09 | 0.1209  |
| <i>Aggregatibacter aphrophilus</i>     | 0.0488 | 0.1±0.21  | 0.02±0.03 | 0.0002  |
| <i>Atopobium rimae</i>                 | 0.0465 | 0.01±0.02 | 0.08±0.14 | <0.0001 |
| Facklamia spp.                         | 0.0462 | 0.1±0.24  | 0±0.01    | <0.0001 |
| <i>Treponema vincentii</i>             | 0.0452 | 0.09±0.2  | 0.03±0.11 | 0.0045  |
| Unclassified Xanthomonadaceae          | 0.045  | 0.04±0.11 | 0.04±0.19 | 0.8617  |
| <i>Mogibacterium neglectum</i>         | 0.0443 | 0.02±0.03 | 0.06±0.07 | <0.0001 |
| <i>Acinetobacter lwoffii</i>           | 0.0441 | 0.02±0.08 | 0.06±0.27 | 0.1108  |
| <i>Streptococcus cristatus</i>         | 0.0429 | 0.01±0.03 | 0.07±0.12 | <0.0001 |
| Unclassified Bacillaceae               | 0.0425 | 0.01±0.02 | 0.07±0.24 | 0.0077  |
| <i>Streptococcus sanguinis</i>         | 0.0423 | 0.07±0.23 | 0.03±0.03 | 0.0648  |
| <i>Streptococcus suis</i>              | 0.0415 | 0.03±0.03 | 0.05±0.05 | 0.0001  |
| <i>Actinomyces dentalis</i>            | 0.0413 | 0.07±0.13 | 0.03±0.05 | 0.0096  |
| Abiotrophia spp.                       | 0.0409 | 0.05±0.11 | 0.03±0.09 | 0.0859  |
| <i>Actinomyces odontolyticus</i>       | 0.0401 | 0.03±0.05 | 0.05±0.05 | 0.0254  |
| <i>Lactobacillus reuteri</i>           | 0.0398 | 0±0.01    | 0.06±0.21 | 0.0051  |
| Clostridium spp.                       | 0.0396 | 0.03±0.05 | 0.04±0.13 | 0.2805  |
| <i>Gemella haemolysans</i>             | 0.0394 | 0.02±0.04 | 0.05±0.09 | 0.0031  |
| Unclassified Coriobacteriales          | 0.0393 | 0.03±0.04 | 0.04±0.04 | 0.0095  |
| <i>Actinomyces israelii</i>            | 0.0388 | 0.05±0.12 | 0.03±0.04 | 0.09    |
| Unclassified Methylobacteriaceae       | 0.0384 | 0.03±0.09 | 0.04±0.06 | 0.2722  |
| <i>Haemophilus quentini</i>            | 0.0379 | 0.08±0.34 | 0±0.01    | 0.0202  |
| Unclassified SR1                       | 0.0376 | 0.07±0.2  | 0.01±0.04 | 0.0128  |
| <i>Lactobacillus vaginalis</i>         | 0.0375 | 0±0.02    | 0.06±0.19 | 0.0035  |
| <i>Cardiobacterium valvarum</i>        | 0.0375 | 0.08±0.18 | 0.01±0.03 | 0.0003  |
| <i>Selenomonas artemidis</i>           | 0.0373 | 0.03±0.06 | 0.04±0.13 | 0.6521  |
| <i>Streptococcus luteciae</i>          | 0.037  | 0.01±0.02 | 0.06±0.09 | <0.0001 |
| Kribbella spp.                         | 0.0364 | 0±0.01    | 0.07±0.13 | <0.0001 |

|                                        |        |           |           |         |
|----------------------------------------|--------|-----------|-----------|---------|
| <i>Gemella morbillorum</i>             | 0.0361 | 0.05±0.06 | 0.03±0.04 | 0.0005  |
| <i>Neisseria flavescens</i>            | 0.036  | 0.07±0.17 | 0.01±0.04 | 0.0027  |
| <i>Leptotrichia trevisanii</i>         | 0.0357 | 0.03±0.12 | 0.04±0.15 | 0.5933  |
| <i>Leptotrichia shahii</i>             | 0.0327 | 0.03±0.18 | 0.03±0.2  | 0.7698  |
| <i>Leptotrichia wadei</i>              | 0.0325 | 0.01±0.03 | 0.05±0.16 | 0.0056  |
| Bacillus spp.                          | 0.0312 | 0.02±0.05 | 0.05±0.11 | 0.026   |
| <i>Actinomyces viscosus</i>            | 0.0311 | 0.05±0.11 | 0.01±0.03 | 0.0066  |
| <i>Campylobacter showae</i>            | 0.03   | 0.05±0.1  | 0.01±0.04 | 0.0005  |
| <i>Leptotrichia goodfellowii</i>       | 0.0292 | 0.05±0.17 | 0.01±0.04 | 0.0474  |
| <i>Johnsonella ignava</i>              | 0.0286 | 0.02±0.07 | 0.04±0.08 | 0.0655  |
| <i>Granulicatella adiacens</i>         | 0.0283 | 0.03±0.03 | 0.03±0.04 | 0.9651  |
| Unclassified Gammaproteobacteria       | 0.028  | 0.05±0.16 | 0±0.02    | 0.005   |
| <i>Lactobacillus gallinarum</i>        | 0.0276 | 0±0       | 0.04±0.27 | 0.1217  |
| <i>Enterococcus italicus</i>           | 0.0274 | 0±0.01    | 0.05±0.15 | 0.0012  |
| <i>Lactobacillus fermentum</i>         | 0.0259 | 0±0.03    | 0.04±0.12 | 0.0036  |
| Unclassified Caulobacteraceae          | 0.0259 | 0.05±0.12 | 0.01±0.02 | 0.0004  |
| <i>Actinobacillus parahaemolyticus</i> | 0.0248 | 0.05±0.26 | 0.01±0.03 | 0.0805  |
| <i>Sphingomonas yabuuchiae</i>         | 0.0248 | 0.04±0.08 | 0.01±0.04 | 0.0012  |
| <i>Streptococcus constellatus</i>      | 0.0243 | 0.03±0.04 | 0.02±0.03 | 0.0924  |
| Unclassified CW040                     | 0.0243 | 0.04±0.11 | 0.01±0.06 | 0.0812  |
| <i>Streptococcus pseudoporcinus</i>    | 0.0243 | 0±0.01    | 0.04±0.04 | <0.0001 |
| Unclassified Carnobacteriaceae         | 0.0242 | 0.02±0.02 | 0.03±0.05 | 0.0051  |
| <i>Fusobacterium periodonticum</i>     | 0.024  | 0.03±0.08 | 0.02±0.05 | 0.1131  |
| <i>Mycoplasma orale</i>                | 0.0239 | 0.05±0.16 | 0.01±0.03 | 0.008   |
| <i>Bulleidia extracta</i>              | 0.0239 | 0±0.01    | 0.04±0.08 | <0.0001 |
| Hylemonella spp.                       | 0.0238 | 0.04±0.11 | 0.01±0.04 | 0.017   |
| Methyloversatilis spp.                 | 0.0237 | 0.01±0.04 | 0.03±0.09 | 0.0627  |
| Unclassified Clostridiales             | 0.0235 | 0.03±0.1  | 0.02±0.09 | 0.9199  |
| Unclassified Enterobacteriaceae        | 0.0233 | 0.02±0.12 | 0.02±0.05 | 0.7736  |
| <i>Actinomyces gerencseriae</i>        | 0.0232 | 0.02±0.04 | 0.02±0.04 | 0.9774  |
| <i>Mogibacterium timidum</i>           | 0.0231 | 0.01±0.03 | 0.03±0.04 | 0.0009  |
| <i>Aeromicrobioides flava</i>          | 0.0229 | 0±0       | 0.04±0.09 | <0.0001 |
| Tepidimonas spp.                       | 0.0226 | 0.01±0.04 | 0.03±0.22 | 0.306   |
| <i>Methylobacterium organophilum</i>   | 0.0226 | 0.01±0.04 | 0.03±0.05 | 0.0006  |
| Unclassified Staphylococcaceae         | 0.0224 | 0.02±0.03 | 0.02±0.04 | 0.4926  |
| <i>Abiotrophia morbi</i>               | 0.0223 | 0.03±0.06 | 0.02±0.05 | 0.4401  |
| Unclassified Coriobacteriaceae         | 0.0222 | 0.01±0.03 | 0.03±0.05 | 0.011   |
| Cardiobacterium spp.                   | 0.0217 | 0.04±0.09 | 0.01±0.03 | 0.0003  |
| <i>Renibacterium salmoninarum</i>      | 0.0216 | 0.03±0.1  | 0.02±0.04 | 0.1829  |
| Propionivibrio spp.                    | 0.0208 | 0.04±0.16 | 0.02±0.07 | 0.1502  |
| <i>Actinomyces meyeri</i>              | 0.0207 | 0.01±0.02 | 0.03±0.03 | <0.0001 |
| Bacteroides spp.                       | 0.0204 | 0.01±0.05 | 0.03±0.1  | 0.1135  |

|                                       |        |           |           |         |
|---------------------------------------|--------|-----------|-----------|---------|
| <i>Enhydrobacter aerosaccus</i>       | 0.0202 | 0.03±0.19 | 0.01±0.03 | 0.3896  |
| <i>Enterococcus mundtii</i>           | 0.0197 | 0±0       | 0.04±0.13 | 0.0068  |
| <i>Capnocytophaga sputigena</i>       | 0.0197 | 0.04±0.1  | 0±0.01    | 0.0001  |
| <i>Megasphaera elsdenii</i>           | 0.0195 | 0.01±0.02 | 0.03±0.06 | 0.0012  |
| <i>Lactobacillus johnsonii</i>        | 0.0193 | 0±0       | 0.03±0.13 | 0.0228  |
| Unclassified Streptophyta             | 0.0193 | 0±0.02    | 0.03±0.07 | 0.0006  |
| <i>Centipeda periodontii</i>          | 0.0192 | 0.03±0.07 | 0.02±0.04 | 0.1368  |
| <i>Peptoniphilus asaccharolyticus</i> | 0.0189 | 0.01±0.02 | 0.02±0.03 | 0.1609  |
| <i>Prevotella nanceiensis</i>         | 0.0188 | 0.03±0.18 | 0±0.01    | 0.1356  |
| <i>Streptococcus dentirosetti</i>     | 0.0183 | 0±0       | 0.03±0.2  | 0.14    |
| <i>Oribacterium sinus</i>             | 0.0183 | 0.03±0.06 | 0.01±0.02 | 0.0539  |
| <i>Streptococcus ursoris</i>          | 0.0179 | 0.01±0.06 | 0.03±0.05 | 0.0306  |
| Lysobacter spp.                       | 0.0175 | 0.03±0.11 | 0.01±0.03 | 0.086   |
| Mogibacterium spp.                    | 0.0173 | 0.01±0.02 | 0.02±0.03 | <0.0001 |
| Enterococcus dispar                   | 0.0166 | 0.02±0.11 | 0.02±0.07 | 0.8694  |
| <i>Pseudoramibacter alactolyticus</i> | 0.0165 | 0.01±0.02 | 0.02±0.05 | 0.0002  |
| Unclassified Actinomycetales          | 0.0164 | 0.02±0.05 | 0.02±0.03 | 0.4915  |
| Aerococcus spp.                       | 0.0162 | 0.01±0.02 | 0.02±0.1  | 0.1276  |
| Novosphingobium spp.                  | 0.0161 | 0.02±0.06 | 0.01±0.04 | 0.3898  |
| Pseudomonas spp.                      | 0.0157 | 0.01±0.02 | 0.02±0.08 | 0.1188  |
| <i>Prevotella salivae</i>             | 0.0157 | 0.01±0.02 | 0.02±0.06 | 0.0307  |
| <i>Streptococcus sinensis</i>         | 0.0156 | 0.01±0.05 | 0.02±0.03 | 0.1378  |
| Unclassified Lactobacillaceae         | 0.0156 | 0±0       | 0.02±0.08 | 0.0022  |
| <i>Dialister micraerophilus</i>       | 0.0155 | 0±0.01    | 0.02±0.06 | 0.0009  |
| Escherichia spp.                      | 0.0149 | 0.03±0.25 | 0±0.01    | 0.3413  |
| <i>Streptococcus intermedius</i>      | 0.0148 | 0.01±0.06 | 0.02±0.03 | 0.0511  |
| <i>Lactobacillus mucosae</i>          | 0.0147 | 0±0.01    | 0.02±0.09 | 0.0366  |
| Staphylococcus spp.                   | 0.0147 | 0.01±0.02 | 0.02±0.03 | 0.0044  |
| Sphingomonas spp.                     | 0.0142 | 0.02±0.06 | 0.01±0.02 | 0.0182  |
| <i>Fusobacterium naviforme</i>        | 0.0141 | 0.01±0.02 | 0.02±0.05 | 0.0198  |
| <i>Lactobacillus antri</i>            | 0.014  | 0±0       | 0.02±0.12 | 0.0932  |
| <i>Gemella bergeri</i>                | 0.0138 | 0.01±0.08 | 0.02±0.06 | 0.6706  |
| <i>Prevotella baroniae</i>            | 0.0137 | 0.01±0.03 | 0.02±0.06 | 0.1021  |
| <i>Streptococcus salivarius</i>       | 0.0134 | 0±0       | 0.02±0.04 | <0.0001 |
| <i>Enterococcus avium</i>             | 0.0132 | 0±0.01    | 0.02±0.09 | 0.0128  |
| Unclassified Moraxellaceae            | 0.013  | 0.01±0.03 | 0.01±0.07 | 0.9236  |
| <i>Tepidimonas aquatica</i>           | 0.013  | 0.02±0.06 | 0.01±0.05 | 0.2411  |
| <i>Staphylococcus pettenkoferi</i>    | 0.013  | 0.01±0.03 | 0.02±0.04 | 0.2369  |
| Desulfovibrio spp.                    | 0.0128 | 0.01±0.07 | 0.02±0.07 | 0.3724  |
| <i>Actinomyces georgiae</i>           | 0.0125 | 0.01±0.03 | 0.01±0.03 | 0.7593  |
| Mycoplasma spp.                       | 0.0124 | 0.02±0.08 | 0.01±0.02 | 0.0504  |
| <i>Prevotella dentalis</i>            | 0.0121 | 0.02±0.05 | 0.01±0.05 | 0.6011  |

|                                      |        |           |           |         |
|--------------------------------------|--------|-----------|-----------|---------|
| <i>Selenomonas infelix</i>           | 0.0121 | 0.02±0.04 | 0.01±0.02 | 0.0017  |
| <i>Atopobium parvulum</i>            | 0.012  | 0±0.01    | 0.02±0.04 | 0.0016  |
| <i>Acholeplasma</i> spp.             | 0.0115 | 0.03±0.18 | 0±0.01    | 0.1494  |
| <i>Prevotella marshii</i>            | 0.0115 | 0.02±0.07 | 0.01±0.02 | 0.0613  |
| <i>Wolbachia</i> spp.                | 0.0115 | 0±0       | 0.02±0.07 | 0.0037  |
| <i>Streptococcus macedonicus</i>     | 0.0113 | 0.02±0.03 | 0±0.01    | <0.0001 |
| <i>Streptococcus gallinaceus</i>     | 0.0109 | 0±0.01    | 0.02±0.02 | <0.0001 |
| <i>Prevotella oralis</i>             | 0.0108 | 0.01±0.02 | 0.01±0.08 | 0.2954  |
| <i>Bulleidia</i> spp.                | 0.0107 | 0±0.01    | 0.01±0.04 | 0.0275  |
| Unclassified Fusobacteriaceae        | 0.0106 | 0.01±0.02 | 0.01±0.02 | 0.4608  |
| <i>Dietzia psychralcaliphila</i>     | 0.0106 | 0.01±0.03 | 0.01±0.03 | 0.2757  |
| <i>Enhydrobacter</i> spp.            | 0.0104 | 0.01±0.1  | 0.01±0.01 | 0.4142  |
| Unclassified Actinobacteria          | 0.0104 | 0±0.01    | 0.01±0.03 | 0.0012  |
| <i>Microbispora rosea</i>            | 0.0102 | 0±0.01    | 0.02±0.03 | <0.0001 |
| <i>Sphingomonas azotifigens</i>      | 0.0101 | 0.02±0.06 | 0±0.01    | 0.0026  |
| <i>Delftia</i> spp.                  | 0.0101 | 0.02±0.04 | 0±0.01    | <0.0001 |
| <i>Streptococcus dysgalactiae</i>    | 0.0101 | 0±0       | 0.02±0.03 | <0.0001 |
| <i>Thermomonas</i> spp.              | 0.0099 | 0.01±0.05 | 0.01±0.03 | 0.7346  |
| <i>Thermomonas hydrothermalis</i>    | 0.0094 | 0±0.01    | 0.02±0.05 | 0.0135  |
| <i>Actinomyces urogenitalis</i>      | 0.0092 | 0.02±0.03 | 0.01±0.02 | 0.008   |
| <i>Lactococcus</i> spp.              | 0.0091 | 0±0       | 0.02±0.04 | 0.0002  |
| <i>Novosphingobium capsulatum</i>    | 0.0089 | 0.02±0.05 | 0±0.02    | 0.0183  |
| <i>Methylobacterium mesophilicum</i> | 0.0089 | 0±0.01    | 0.02±0.03 | <0.0001 |
| <i>Arthrobacter</i> spp.             | 0.0087 | 0.01±0.04 | 0.01±0.03 | 0.7108  |
| <i>Neisseria lactamica</i>           | 0.0087 | 0.01±0.03 | 0.01±0.06 | 0.4138  |
| <i>Neisseria weaveri</i>             | 0.0086 | 0.01±0.03 | 0.01±0.01 | 0.0023  |
| <i>Bifidobacterium dentium</i>       | 0.008  | 0±0       | 0.01±0.06 | 0.0329  |
| <i>Peptostreptococcus stomatis</i>   | 0.008  | 0±0       | 0.01±0.03 | <0.0001 |
| <i>Bacillus humi</i>                 | 0.0079 | 0±0       | 0.01±0.06 | 0.0196  |
| <i>Actinomyces massiliensis</i>      | 0.0076 | 0.01±0.02 | 0.01±0.02 | 0.5843  |
| <i>Lactobacillus intestinalis</i>    | 0.0076 | 0±0       | 0.01±0.07 | 0.1536  |
| <i>Actinobacillus</i> spp.           | 0.0074 | 0.01±0.04 | 0±0.01    | 0.0037  |
| <i>Capnocytophaga granulosa</i>      | 0.0072 | 0.01±0.03 | 0.01±0.01 | 0.7736  |
| <i>Neisseria cinerea</i>             | 0.0072 | 0.01±0.02 | 0±0.01    | 0.0757  |
| <i>Prevotella enoeca</i>             | 0.0069 | 0±0.02    | 0.01±0.04 | 0.3992  |
| <i>Neisseria gonorrhoeae</i>         | 0.0068 | 0.02±0.03 | 0±0.01    | <0.0001 |
| <i>Lactobacillus ultunensis</i>      | 0.0067 | 0±0       | 0.01±0.04 | 0.019   |
| <i>Acidovorax</i> spp.               | 0.0066 | 0±0.01    | 0.01±0.04 | 0.1349  |
| <i>Clostridium botulinum</i>         | 0.0066 | 0.01±0.03 | 0±0.01    | 0.0052  |
| <i>Parascardovia denticolens</i>     | 0.0063 | 0.01±0.03 | 0±0.02    | 0.1782  |
| <i>Clostridium intestinale</i>       | 0.0061 | 0±0.01    | 0.01±0.04 | 0.0562  |
| <i>Haemophilus influenzae</i>        | 0.0061 | 0.01±0.03 | 0±0       | 0.002   |

|                                       |        |           |           |         |
|---------------------------------------|--------|-----------|-----------|---------|
| <i>Actinomyces oricola</i>            | 0.0061 | 0.01±0.03 | 0±0.01    | 0.0002  |
| <i>Streptococcus agalactiae</i>       | 0.006  | 0±0.01    | 0.01±0.02 | 0.3009  |
| <i>Asticcacaulis excentricus</i>      | 0.0059 | 0.01±0.08 | 0±0       | 0.2212  |
| <i>Rothia</i> spp.                    | 0.0058 | 0.01±0.01 | 0.01±0.01 | 0.6177  |
| <i>Enterococcus faecalis</i>          | 0.0058 | 0.01±0.03 | 0±0.01    | 0.2041  |
| <i>Actinomyces cardiffensis</i>       | 0.0055 | 0.01±0.05 | 0±0.01    | 0.2622  |
| <i>Pseudomonas putida</i>             | 0.0052 | 0±0.01    | 0.01±0.07 | 0.3599  |
| <i>Prevotella buccae</i>              | 0.0051 | 0.01±0.04 | 0±0.01    | 0.0273  |
| <i>Gemella sanguinis</i>              | 0.0049 | 0.01±0.02 | 0±0.01    | 0.2362  |
| <i>Methylobacterium fujiisawaense</i> | 0.0048 | 0±0.01    | 0.01±0.02 | 0.0001  |
| <i>Streptococcus downei</i>           | 0.0047 | 0±0       | 0.01±0.08 | 0.2689  |
| <i>Acidovorax delafieldii</i>         | 0.0047 | 0.01±0.04 | 0±0.01    | 0.0454  |
| <i>Streptococcus hyointestinalis</i>  | 0.0042 | 0±0       | 0.01±0.02 | <0.0001 |
| <i>Streptococcus australis</i>        | 0.004  | 0.01±0.02 | 0±0.01    | 0.0645  |
| <i>Kingella kingae</i>                | 0.004  | 0±0.01    | 0.01±0.01 | 0.0081  |
| <i>Streptococcus massiliensis</i>     | 0.004  | 0±0       | 0.01±0.02 | 0.0031  |
| <i>Streptococcus parasanguinis</i>    | 0.004  | 0±0       | 0.01±0.01 | <0.0001 |
| <i>Prevotella genomosp</i>            | 0.0039 | 0.01±0.02 | 0±0.01    | 0.0535  |
| <i>Lactobacillus helveticus</i>       | 0.0038 | 0±0       | 0.01±0.03 | 0.0765  |
| <i>Bifidobacterium</i> spp.           | 0.0037 | 0±0       | 0.01±0.02 | 0.0132  |
| <i>Megasphaera sueciensis</i>         | 0.0036 | 0±0.01    | 0.01±0.01 | 0.0009  |
| <i>Asticcacaulis</i> spp.             | 0.0035 | 0.01±0.03 | 0±0       | 0.0865  |
| <i>Mycoplasma faucium</i>             | 0.0035 | 0.01±0.02 | 0±0.01    | 0.0417  |
| <i>Pseudomonas stutzeri</i>           | 0.0034 | 0±0       | 0.01±0.02 | 0.0012  |
| <i>Lactococcus lactis</i>             | 0.0032 | 0±0.01    | 0.01±0.02 | 0.1484  |
| <i>Treponema putidum</i>              | 0.0032 | 0.01±0.02 | 0±0.01    | 0.1024  |
| <i>Desulfovibrio desulfuricans</i>    | 0.0032 | 0±0       | 0.01±0.03 | 0.0477  |
| <i>Actinomyces bowdenii</i>           | 0.0032 | 0.01±0.01 | 0±0.01    | 0.0014  |
| <i>Streptococcus alactolyticus</i>    | 0.0032 | 0±0       | 0.01±0.01 | <0.0001 |
| <i>Streptococcus didelphis</i>        | 0.0032 | 0±0       | 0.01±0.01 | <0.0001 |
| <i>Mycoplasma salivarium</i>          | 0.003  | 0.01±0.04 | 0±0       | 0.0598  |
| <i>Prevotella loescheii</i>           | 0.003  | 0.01±0.02 | 0±0.01    | 0.0063  |
| <i>Bacteroides uniformis</i>          | 0.0027 | 0.01±0.01 | 0±0       | <0.0001 |
| <i>Actinomyces ruminicola</i>         | 0.0025 | 0.01±0.04 | 0±0       | 0.1117  |
| <i>Capnocytophaga haemolytica</i>     | 0.0021 | 0.01±0.03 | 0±0       | 0.0332  |
